# Supplementary material for: SerpinA3N attenuates ischemic stroke injury by reducing apoptosis and neuroinflammation
Source: PubMed Central journal article supplement (PMC8928918; doi:10.1111/cns.13776), 2021-12-12
Supplement: CNS-28-566-s001.pdf [file CNS-28-566-s001.pdf]

**serpina3n**

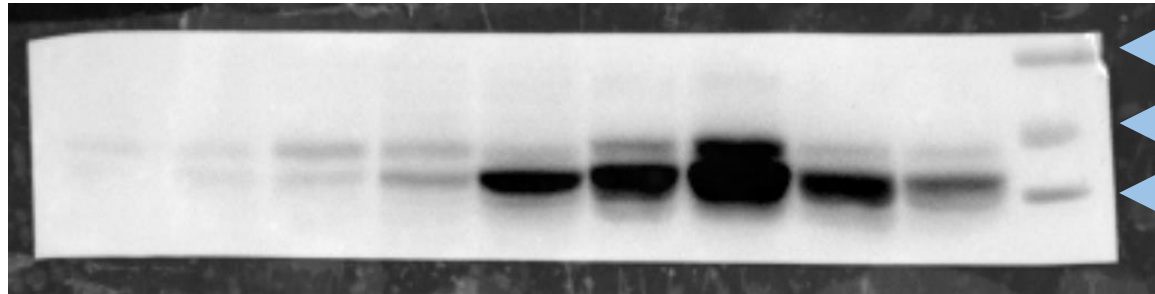

**MW marker**

95kDa

72kDa

55kDa

**$\beta$ -tublin**

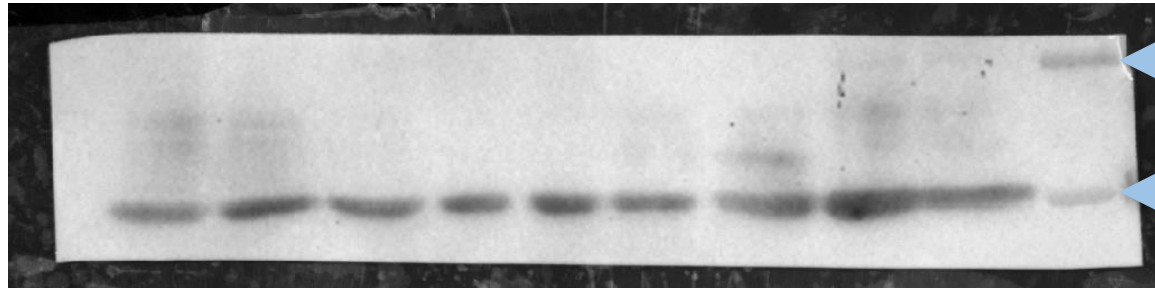

95kDa

55kDa

**Full unedited gel/blot for Figure 1B in the manuscript**

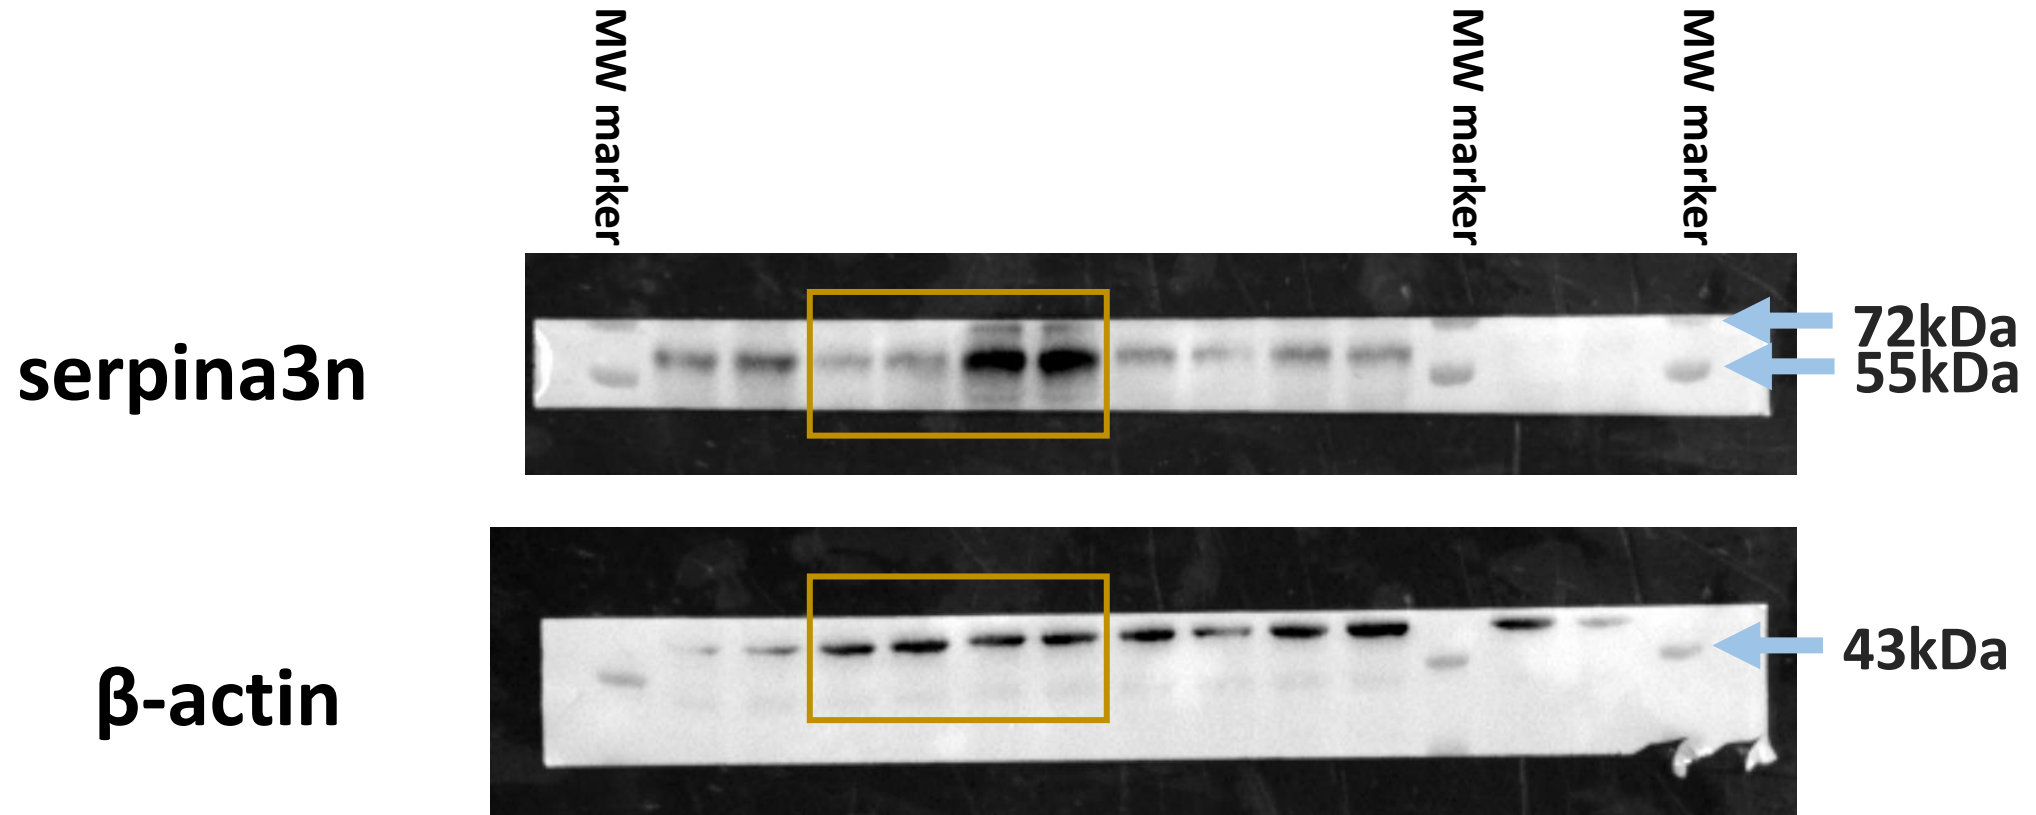

Full unedited gel/blot for Figure 2B in the manuscript

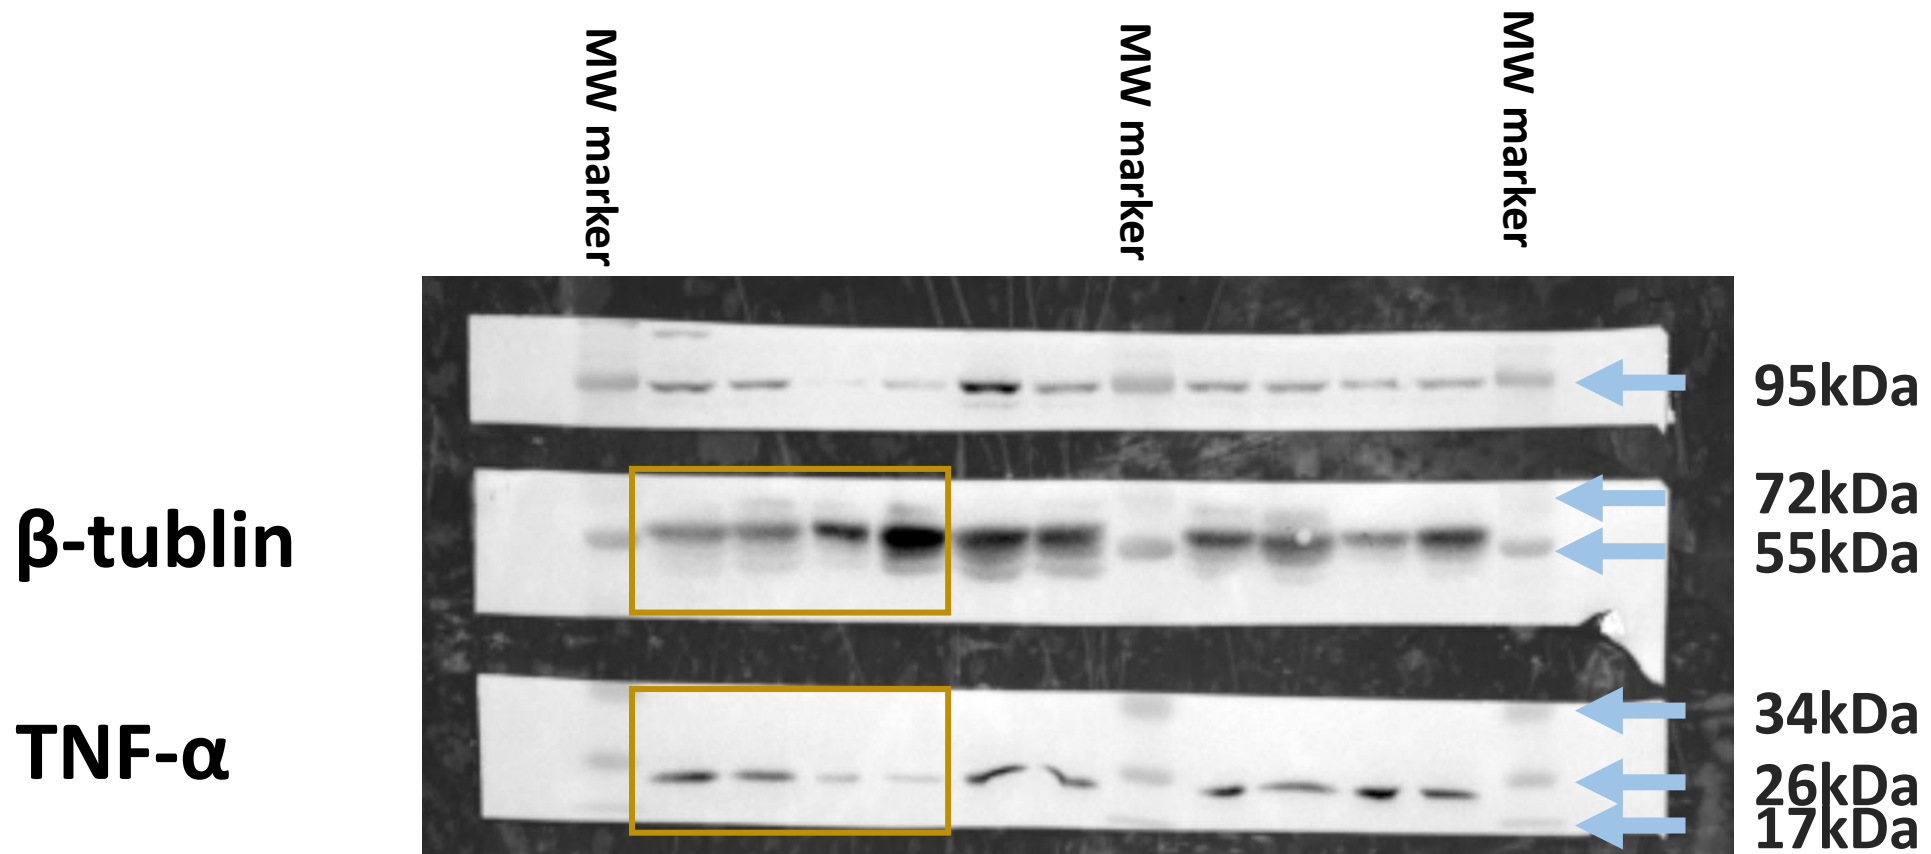

Full unedited gel/blot for figure 3B in the manuscript

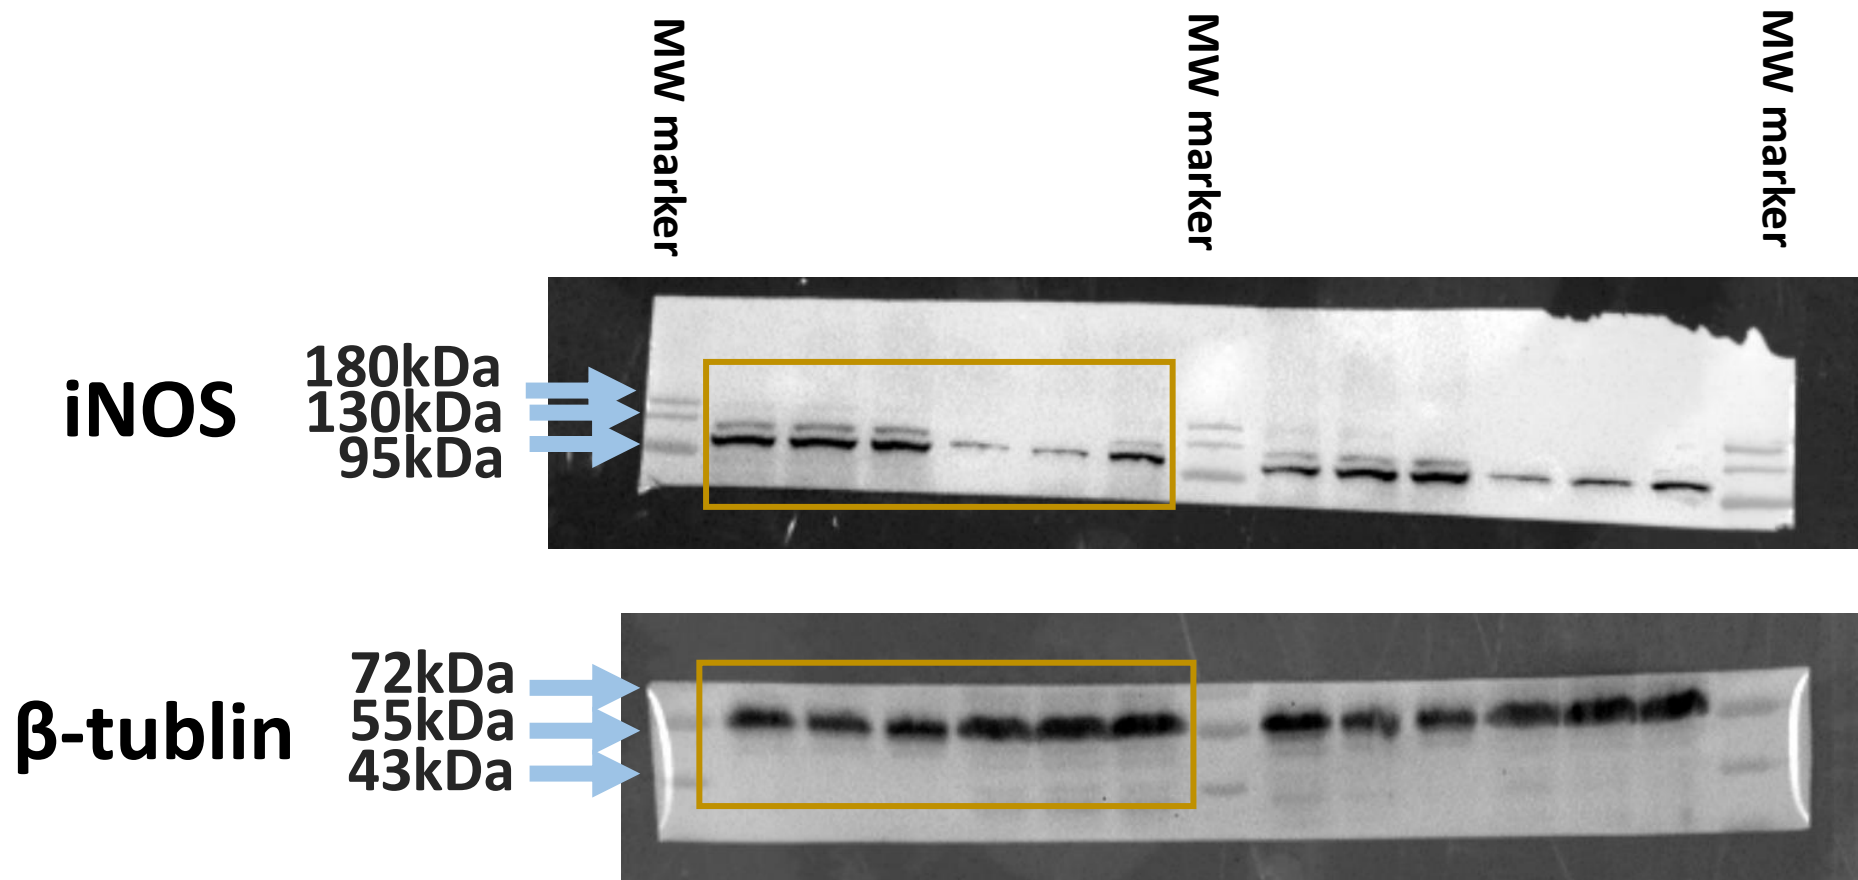

Full unedited gel/blot for figure 3D in the manuscript

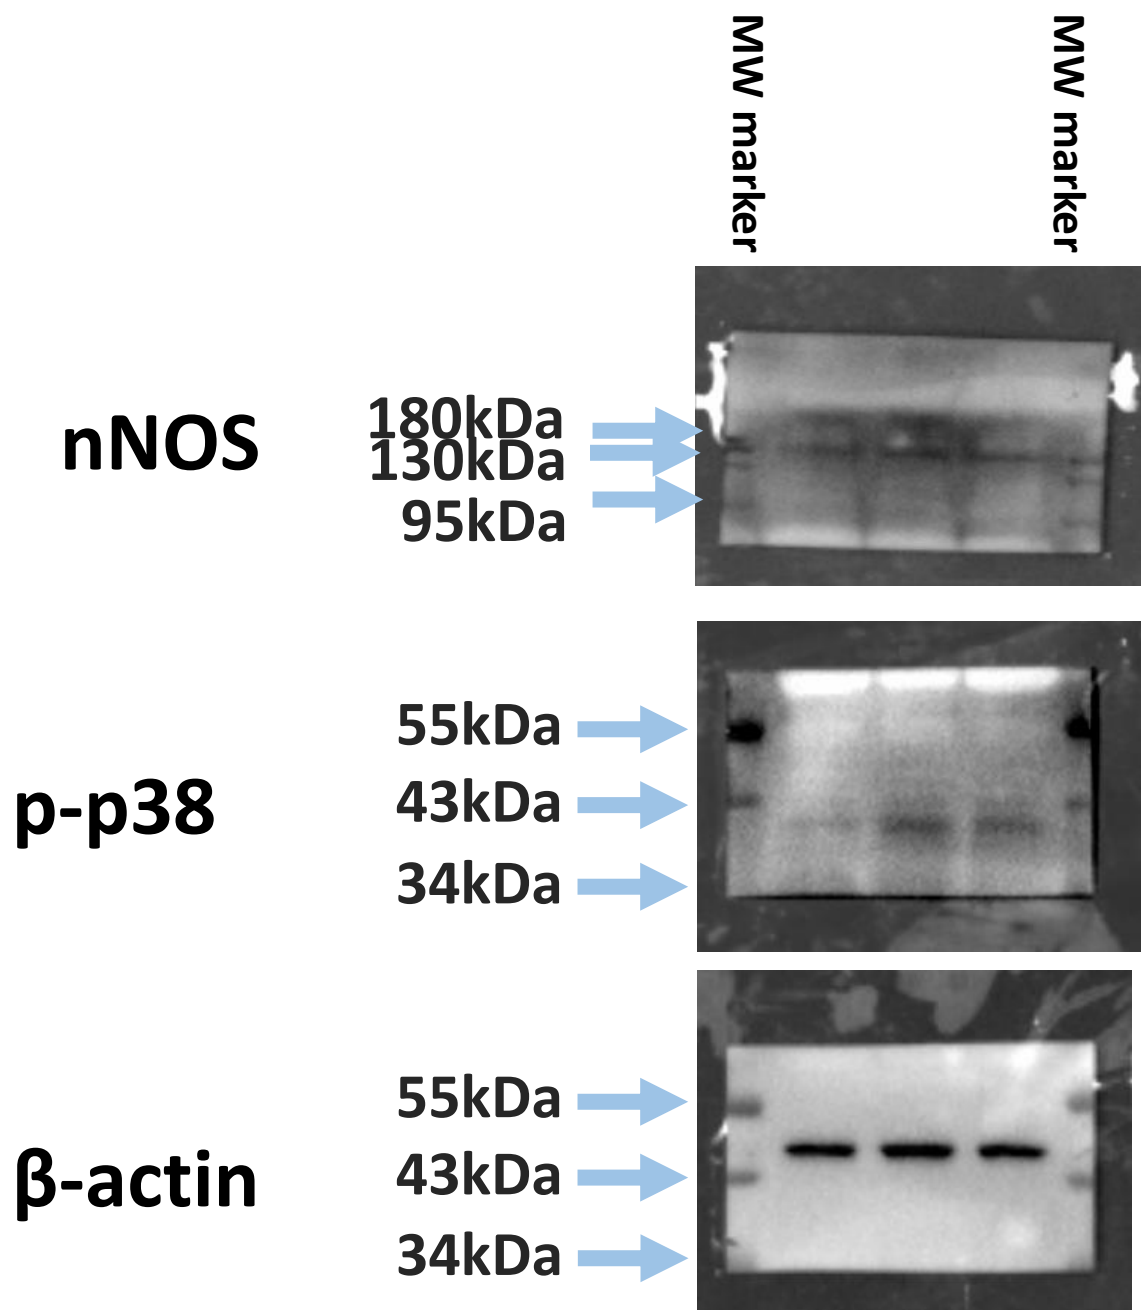

Full unedited gel/blot for figure 4B in the manuscript

**bax**

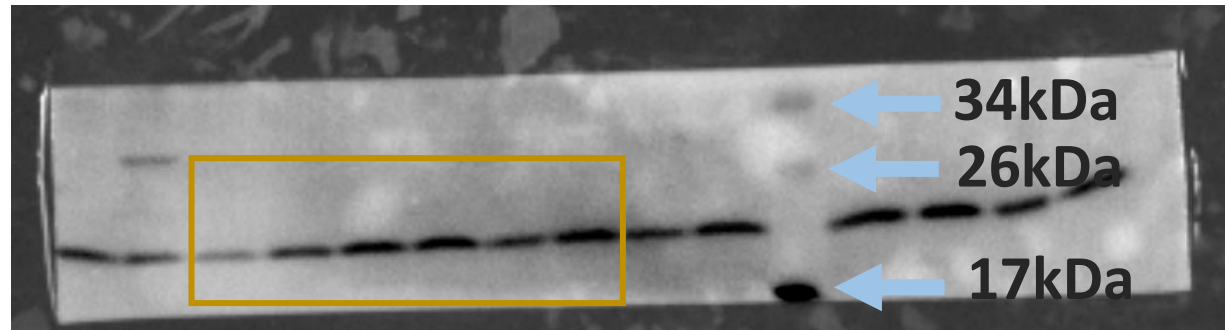

**bcl-2**

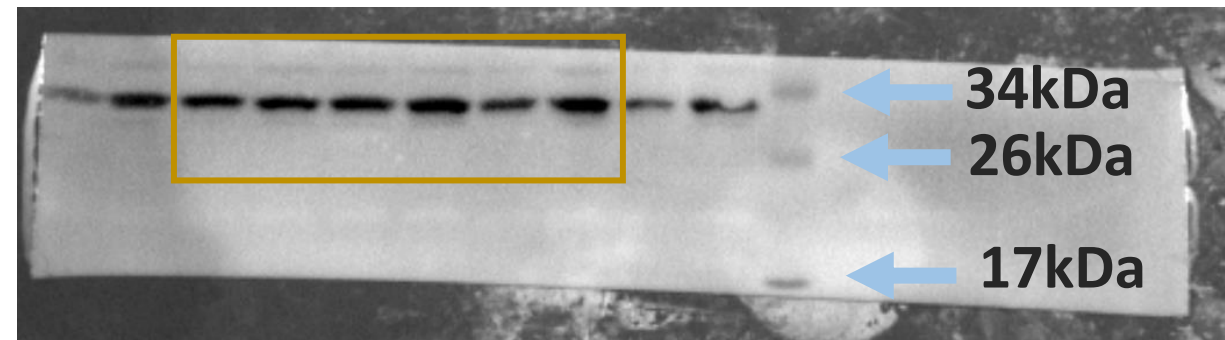

**$\beta$ -actin**

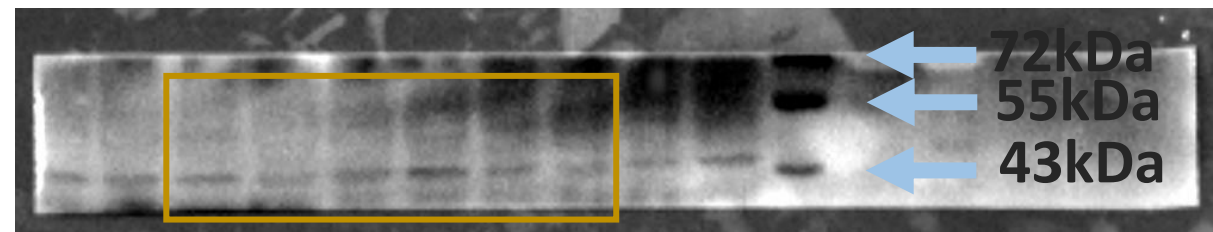

Full unedited gel/blot for Figure 4C in the manuscript

**caspase-3**

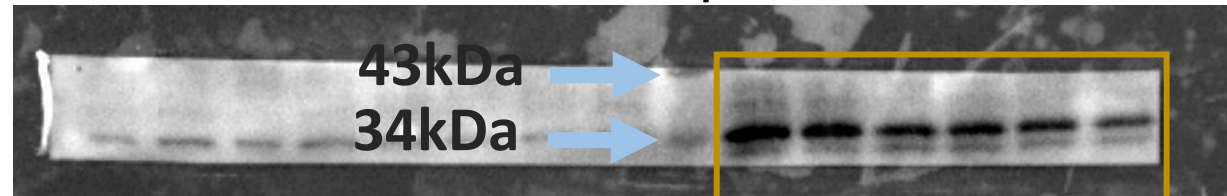

**Cleaved  
caspase-3**

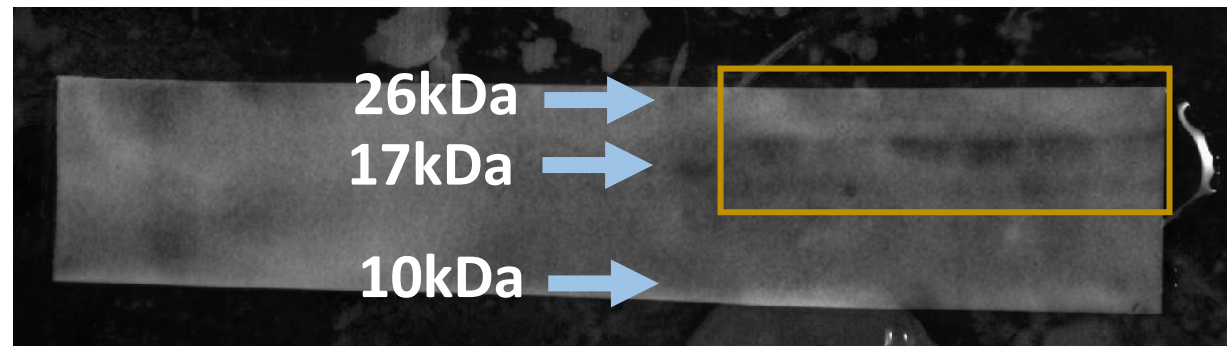

**$\beta$ -tublin**

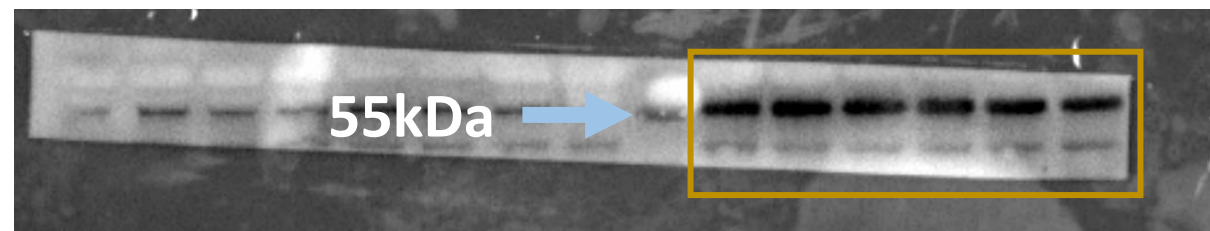

Full unedited gel/blot for Figure 4D in the manuscript

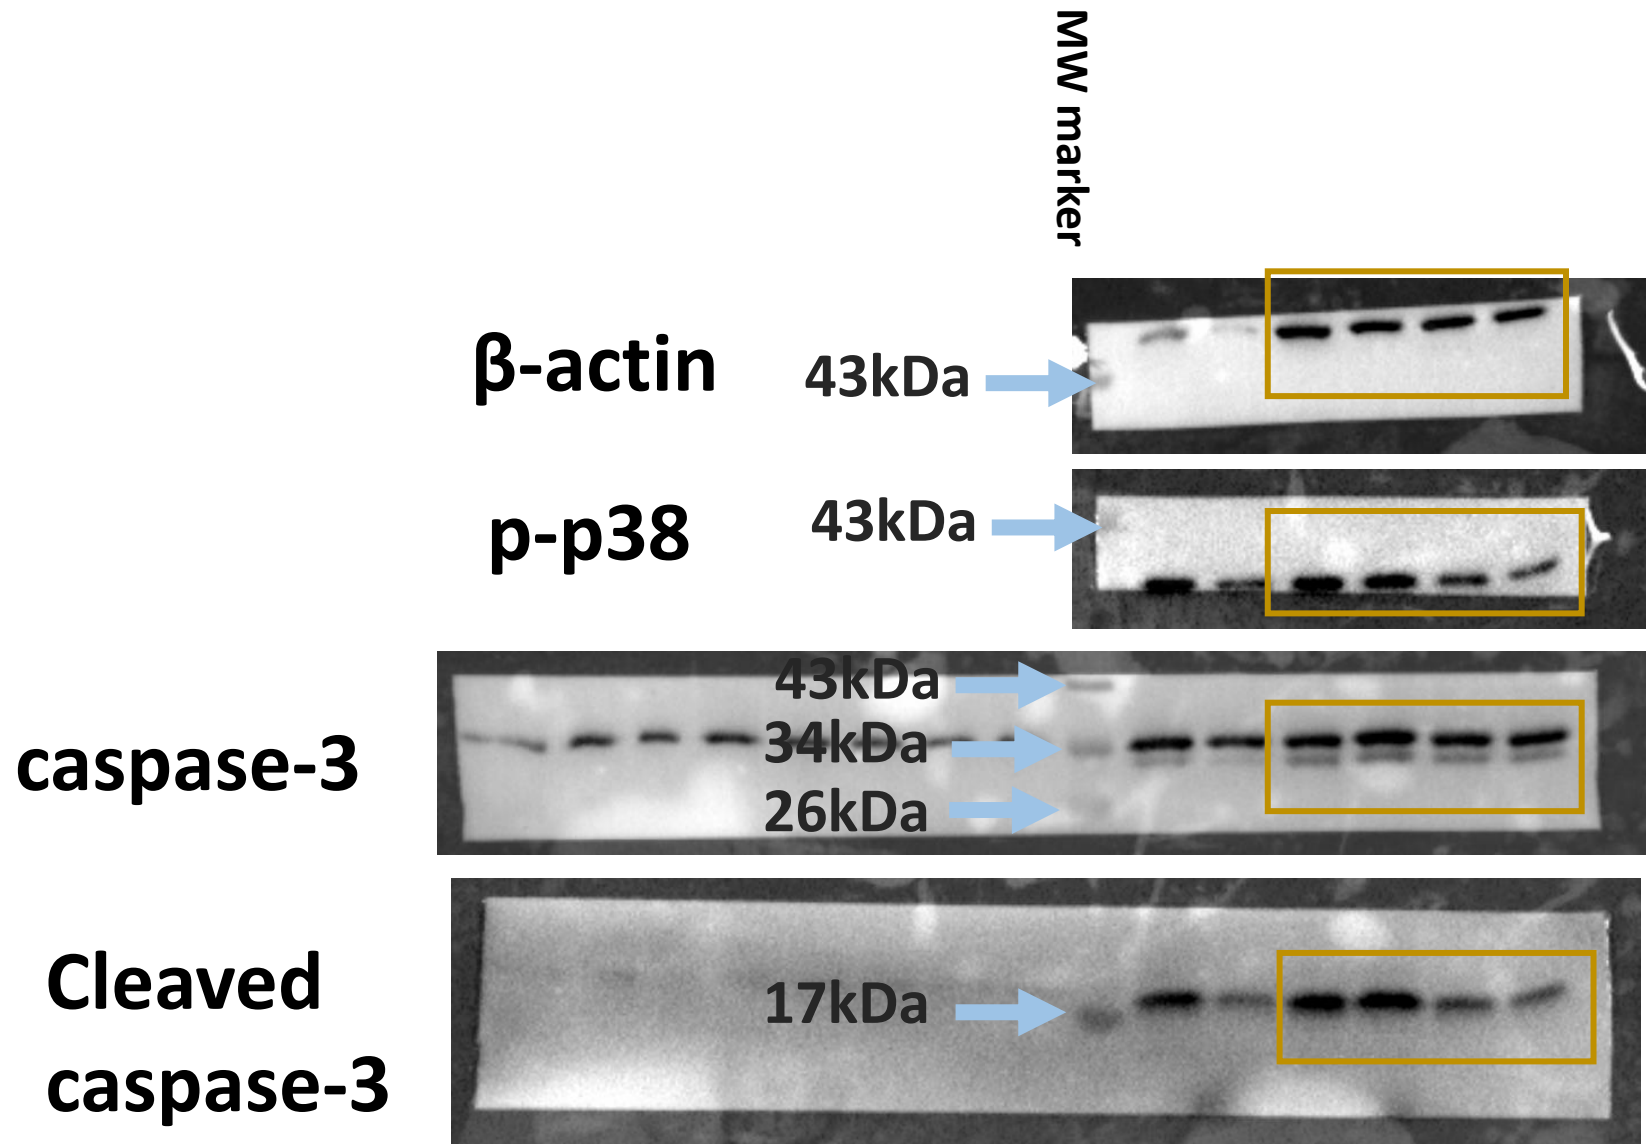

Full unedited gel/blot for Figure 4E in the manuscript



**$\beta$ -actin**

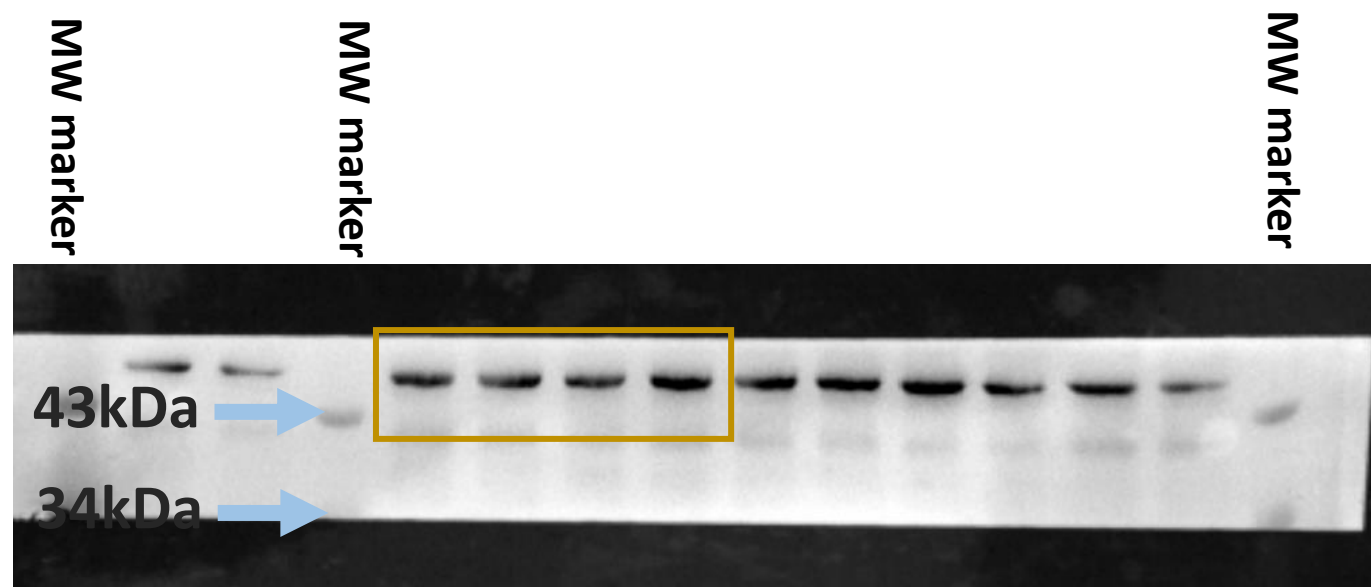

**bcl-2**

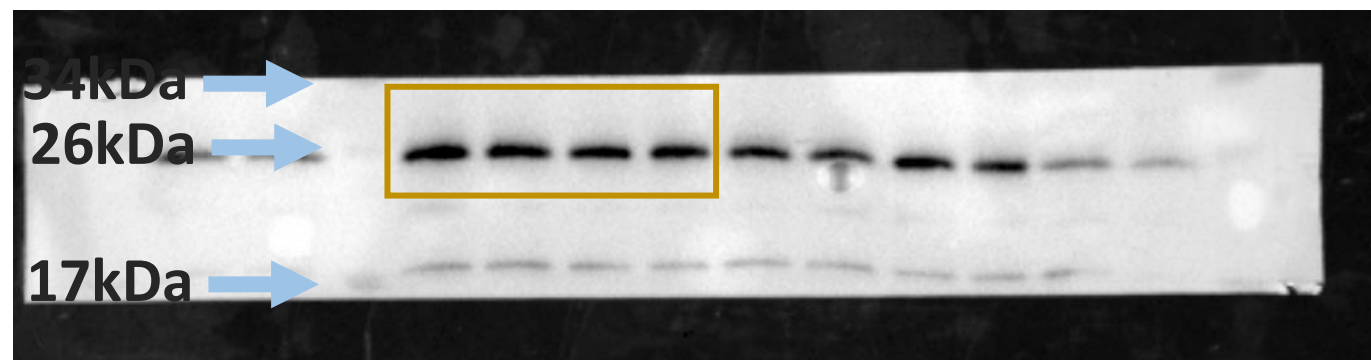

**bax**

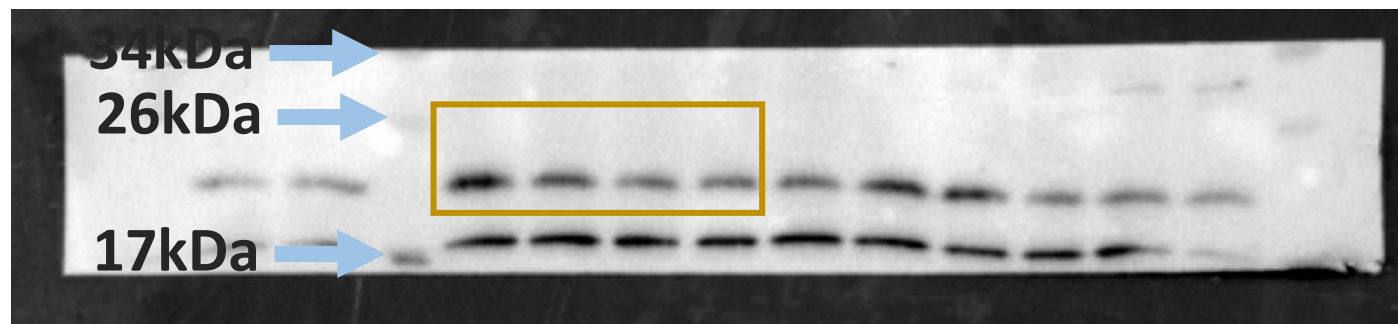

Full unedited gel/blot for Figure 4F in the manuscript

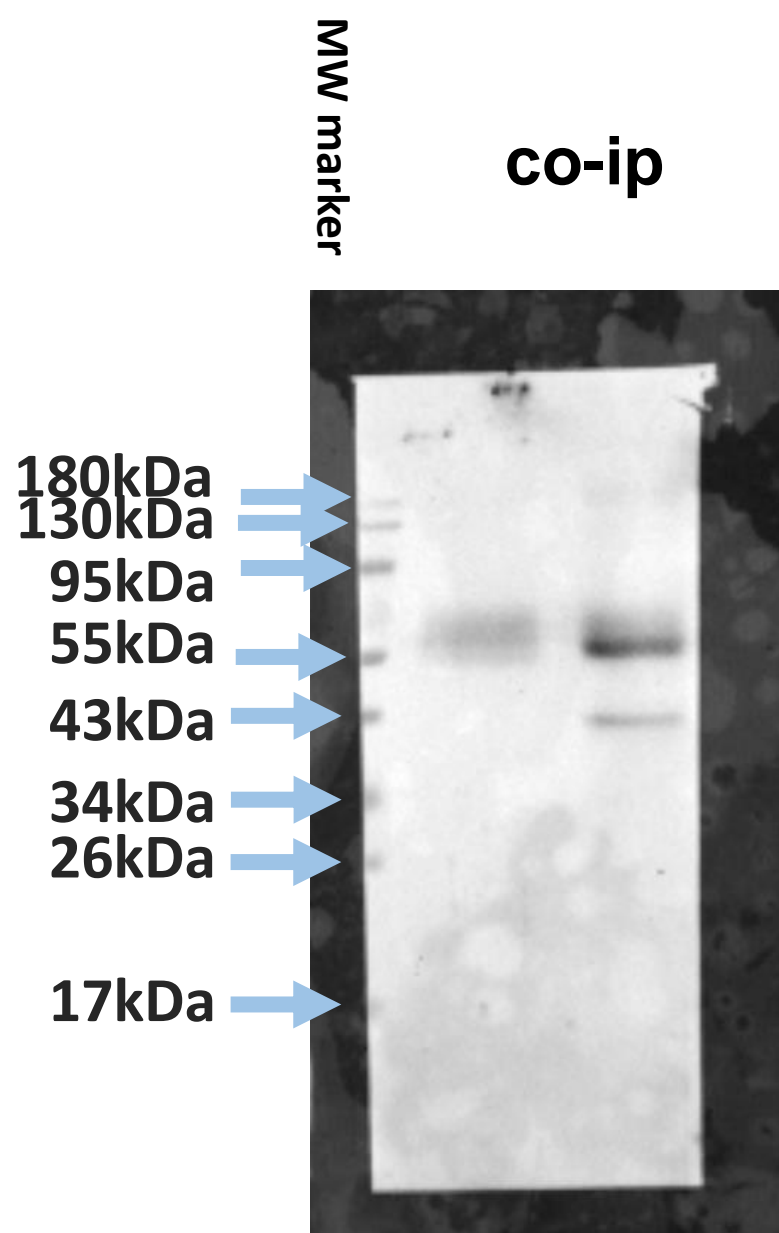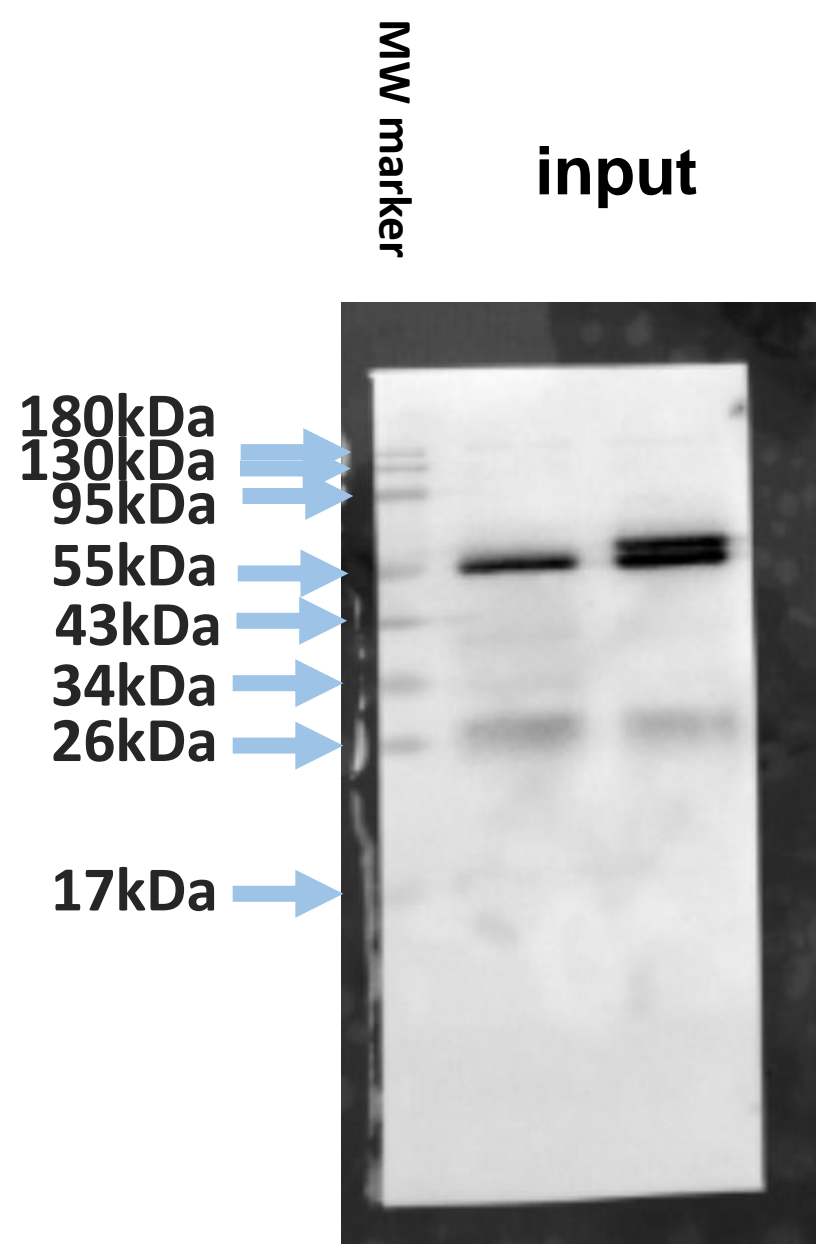

Full unedited gel/blot for **Figure 5A** in the manuscript

**co-ip**

MW marker

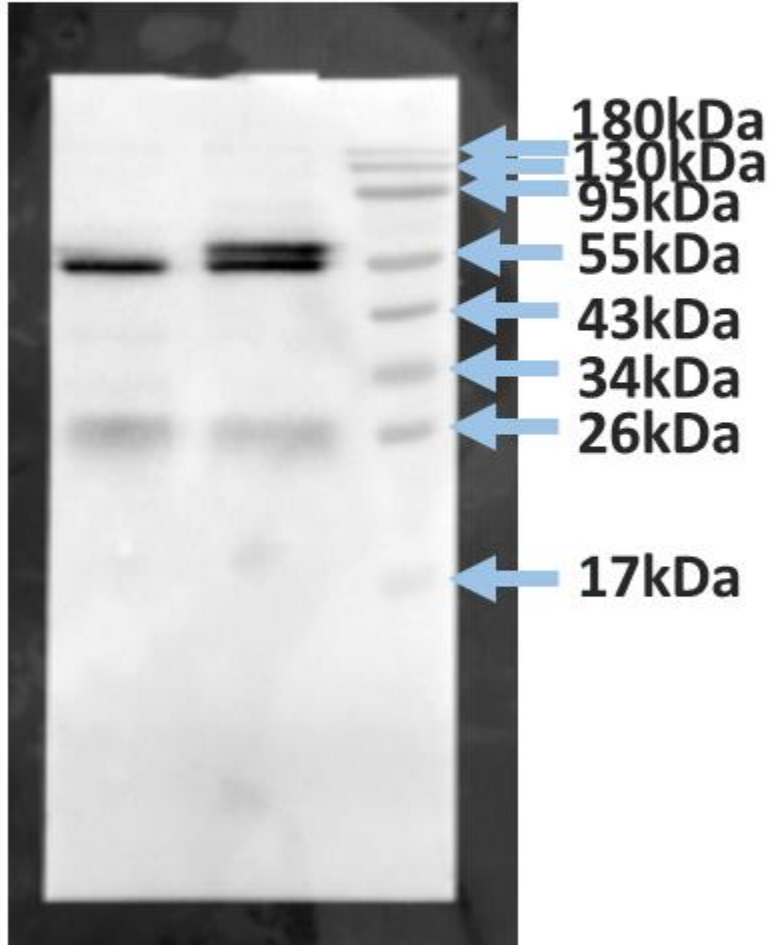

**input**

MW marker

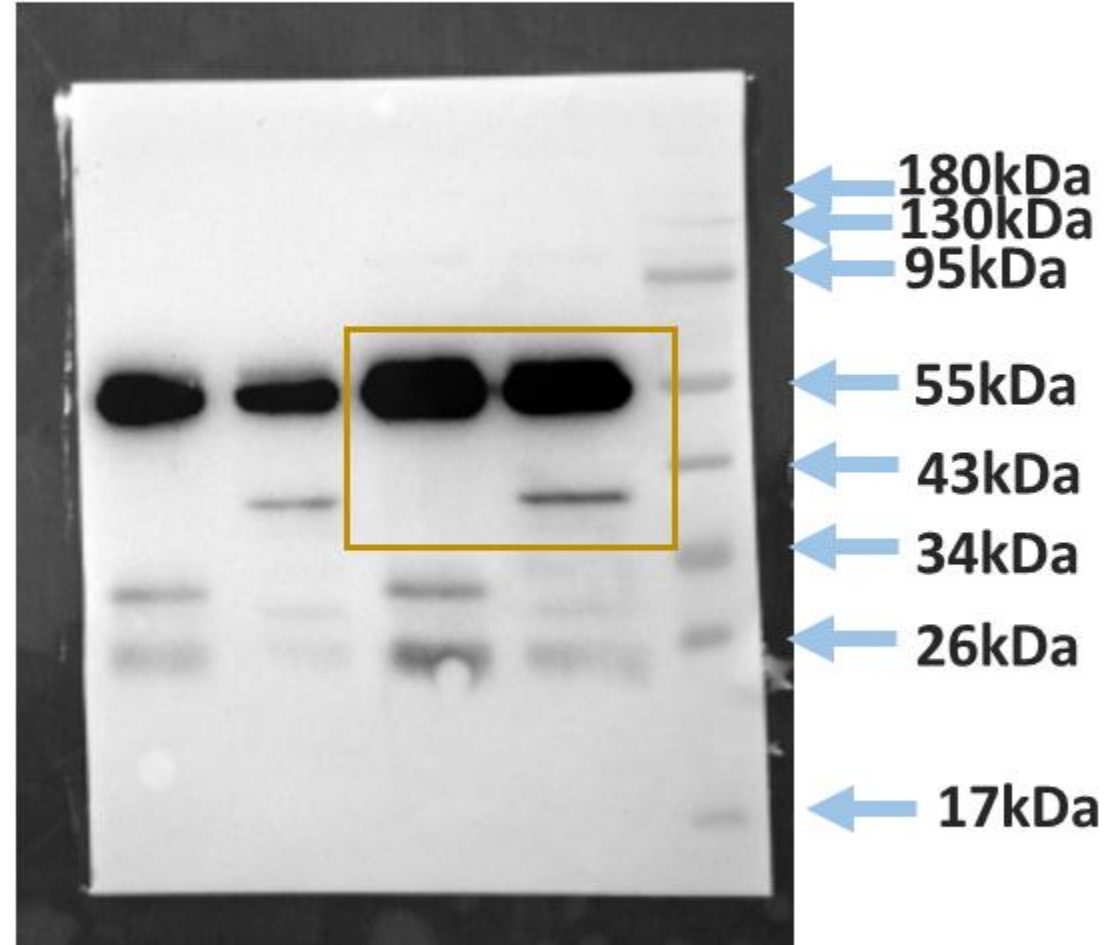

Full unedited gel/blot for Figure 5B in the manuscript

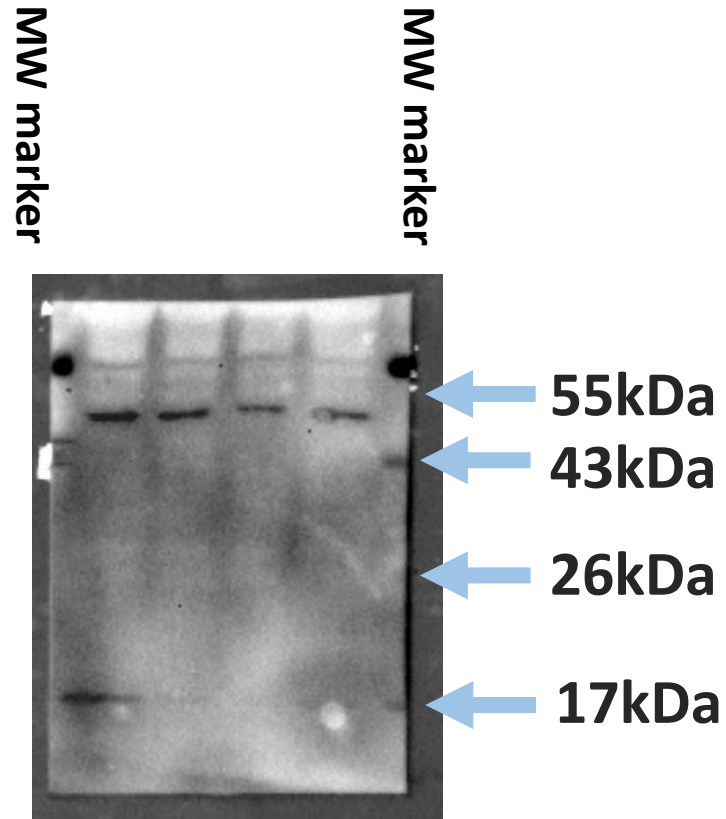

**clusterin- $\alpha$**

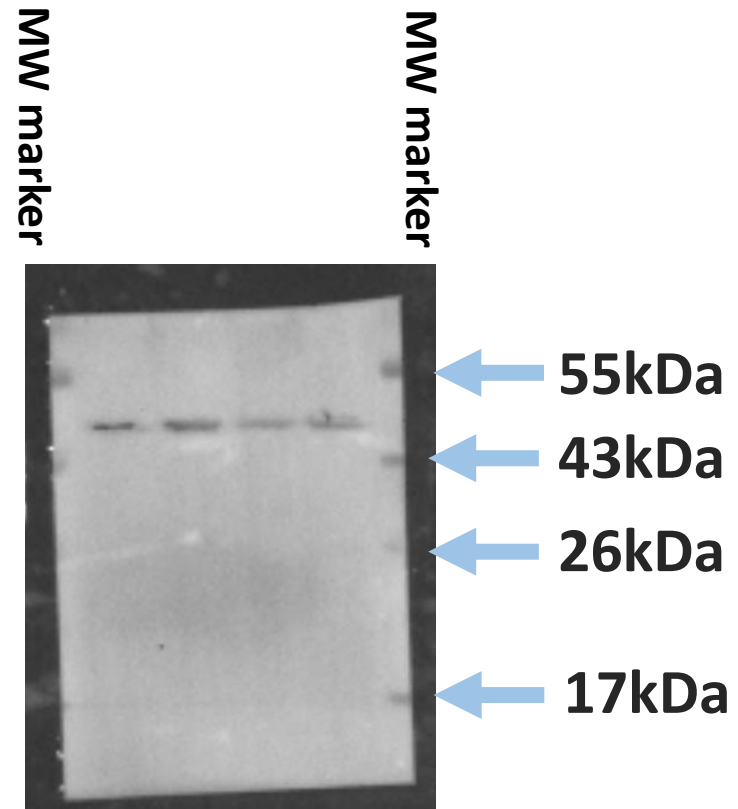

**$\beta$ -actin**

Full unedited gel/blot for Figure 5D in the manuscript

**clusterin- $\alpha$**

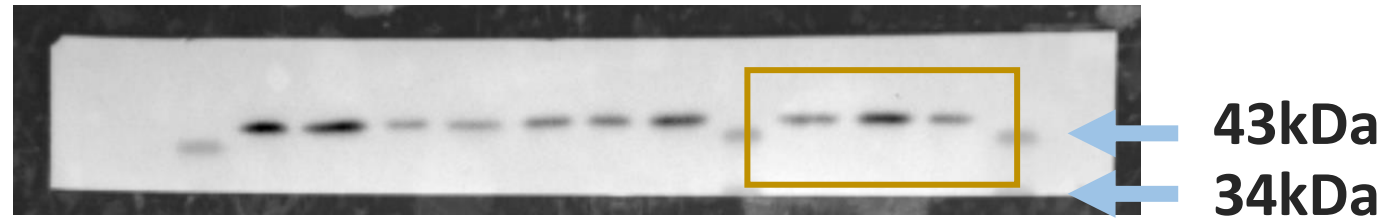

**$\beta$ -tublin**

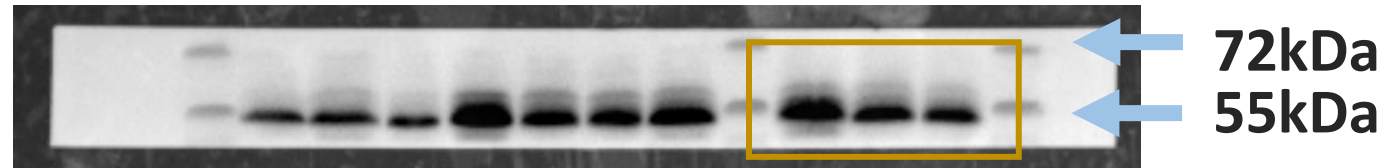

Full unedited gel/blot for Figure 5E in the manuscript

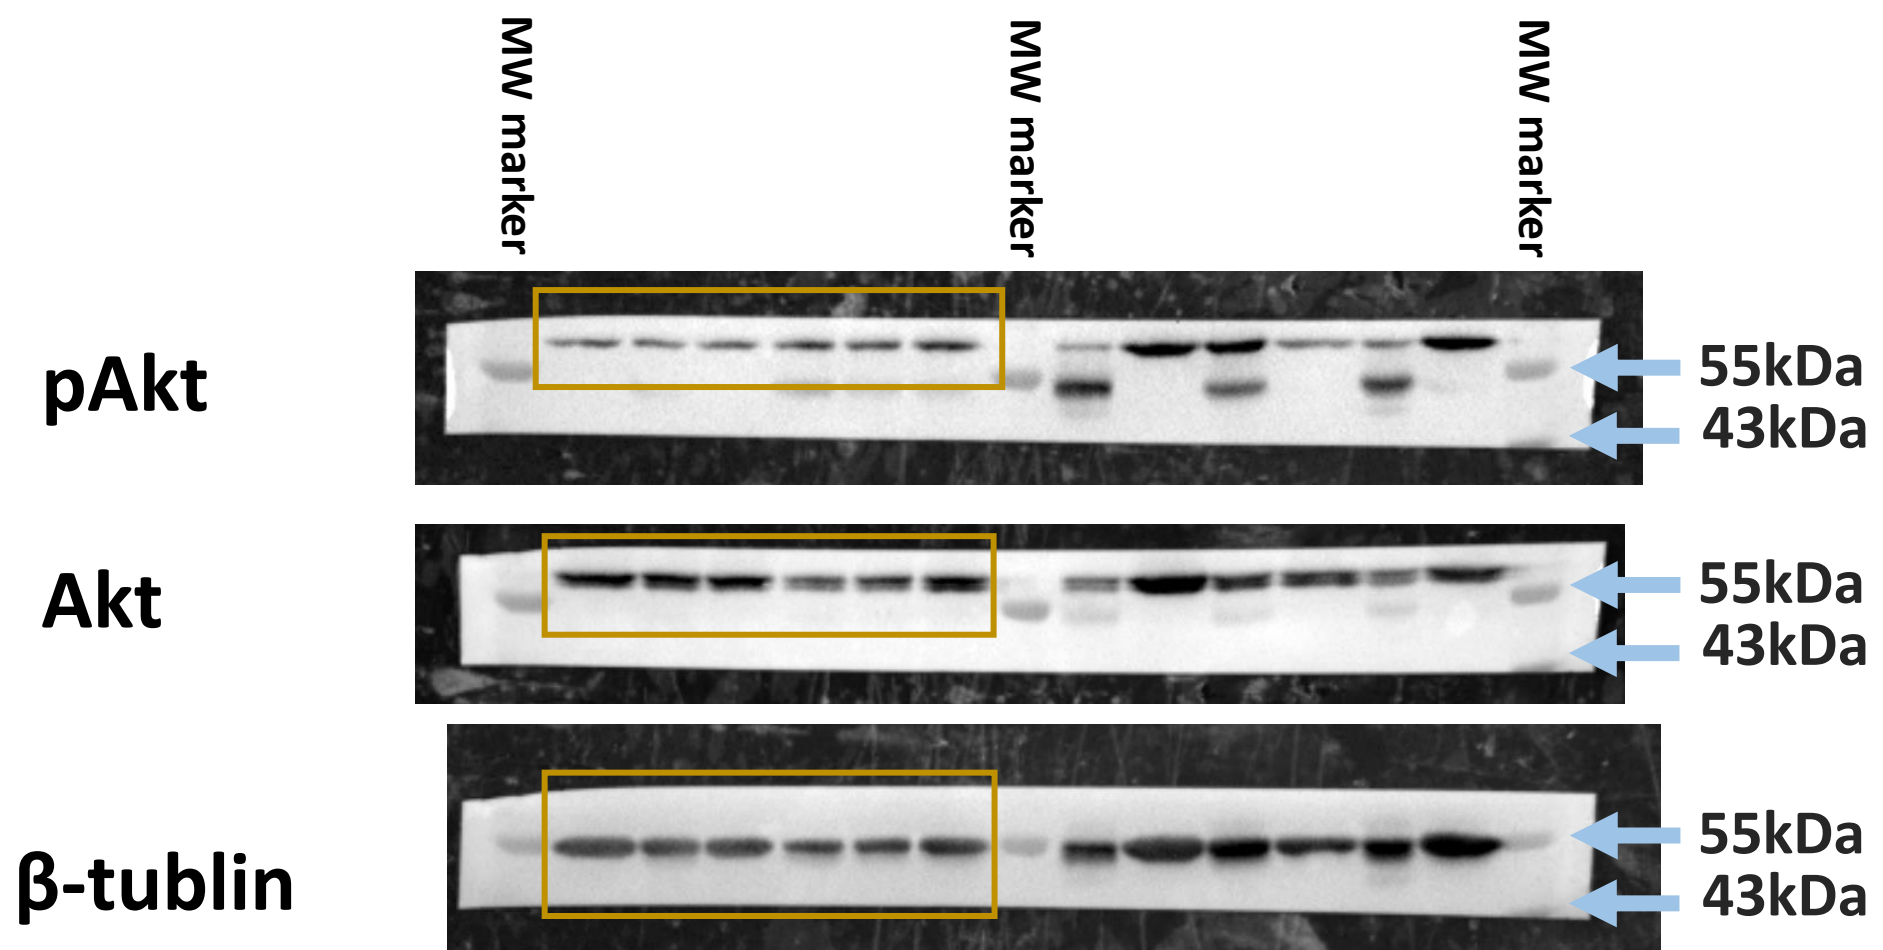

Full unedited gel/blot for Figure 6A in the manuscript

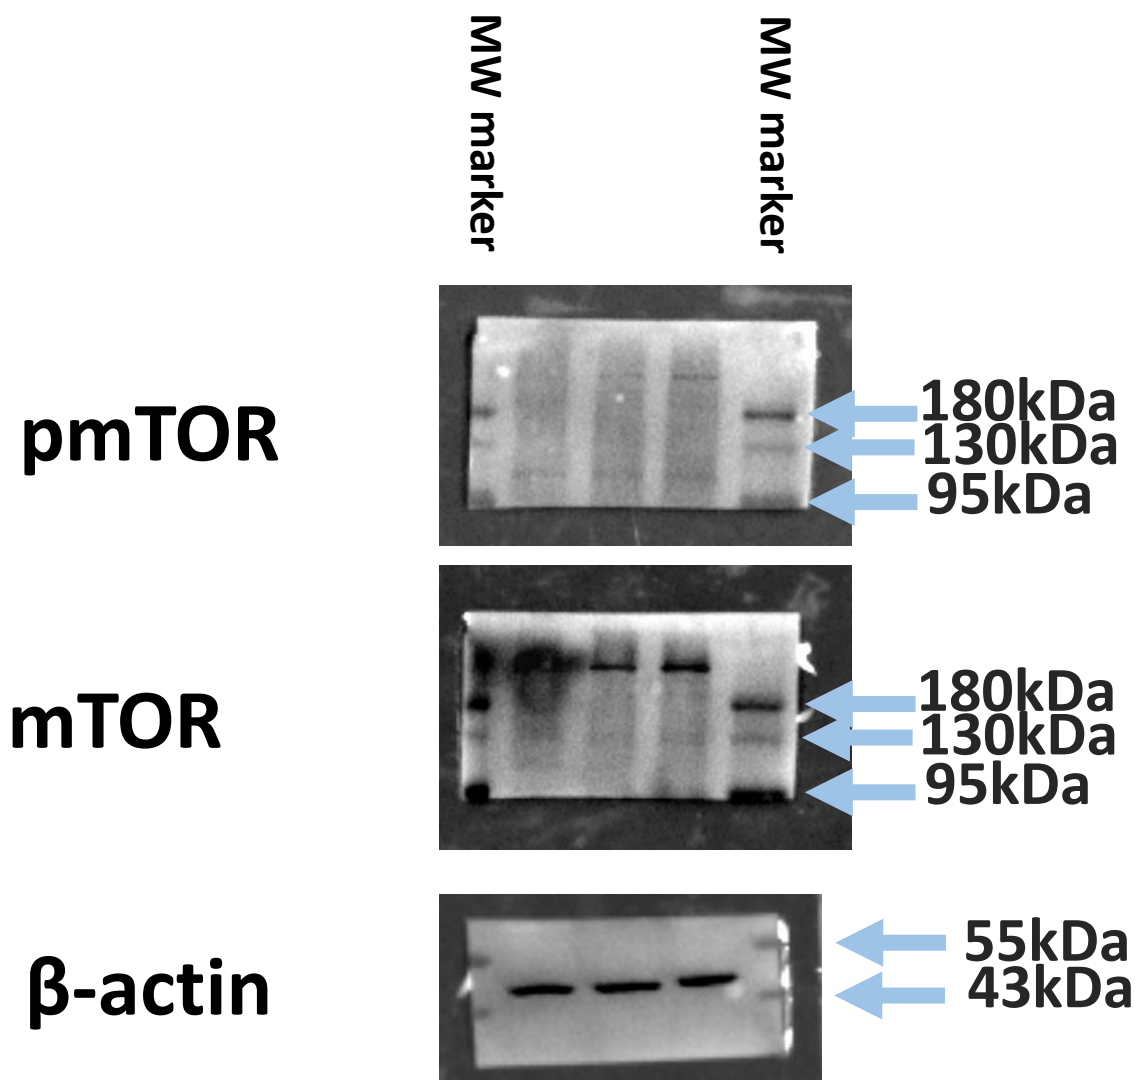

Full unedited gel/blot for Figure 6B in the manuscript

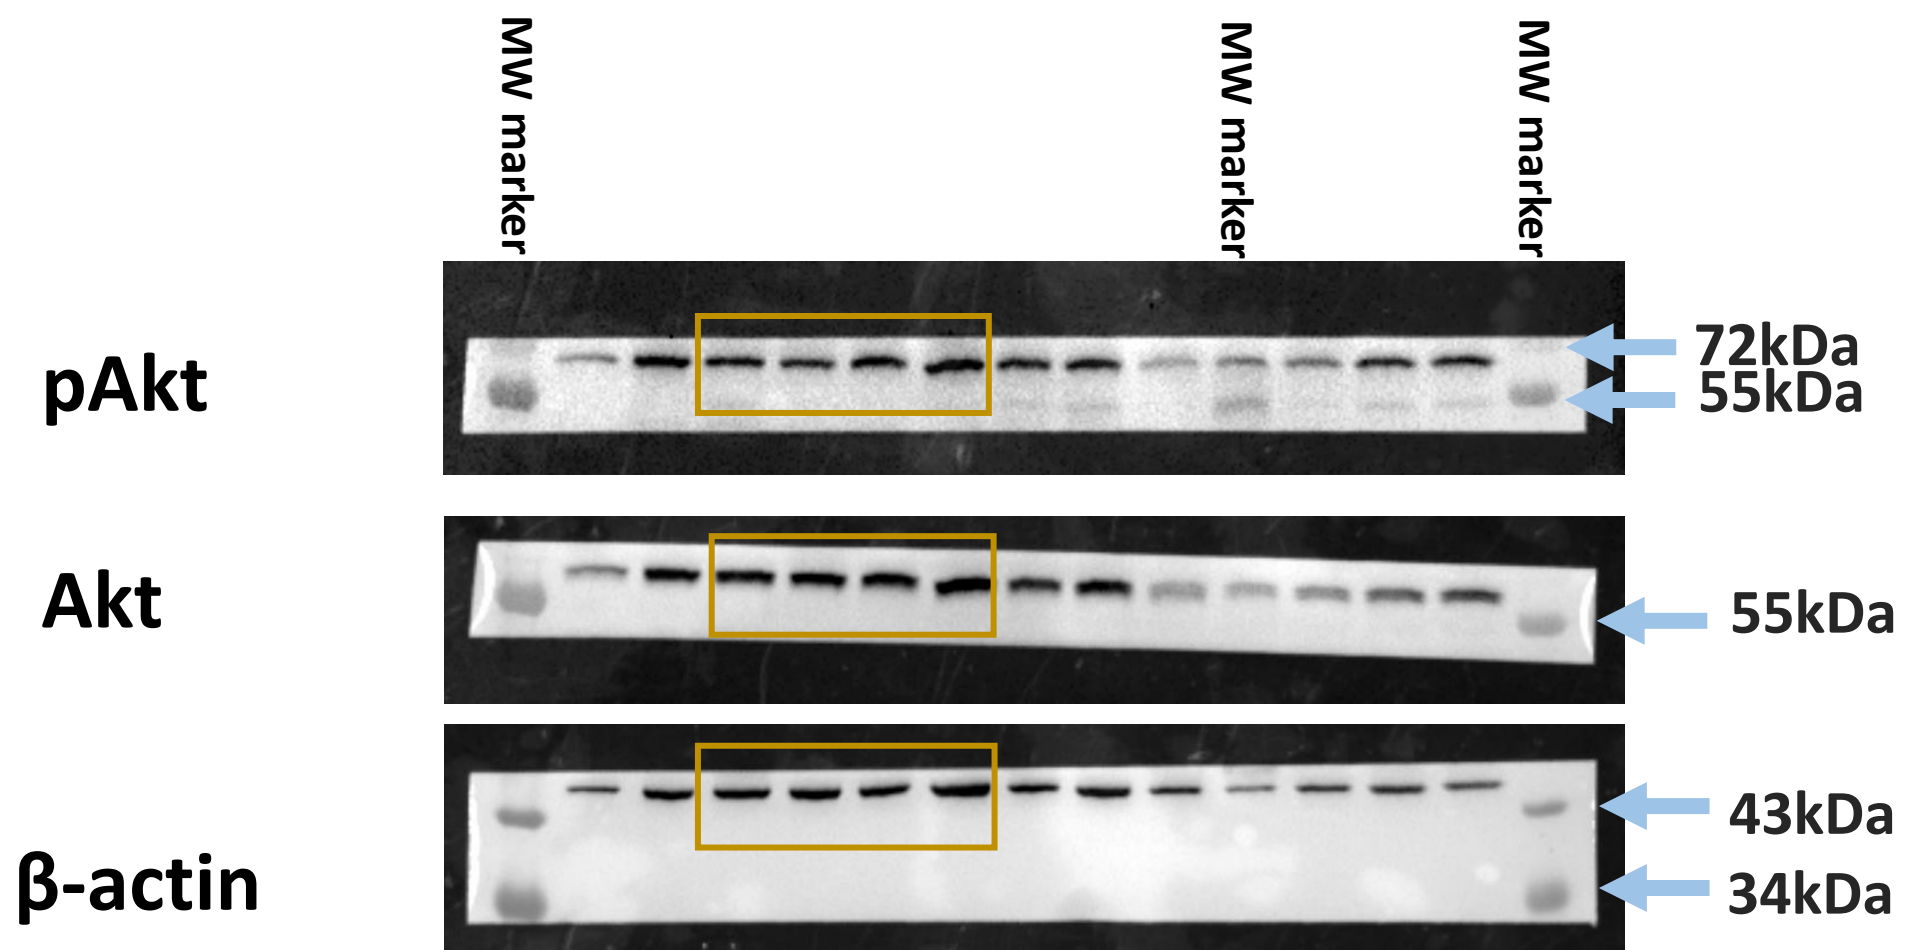

Full unedited gel/blot for Figure 6C in the manuscript



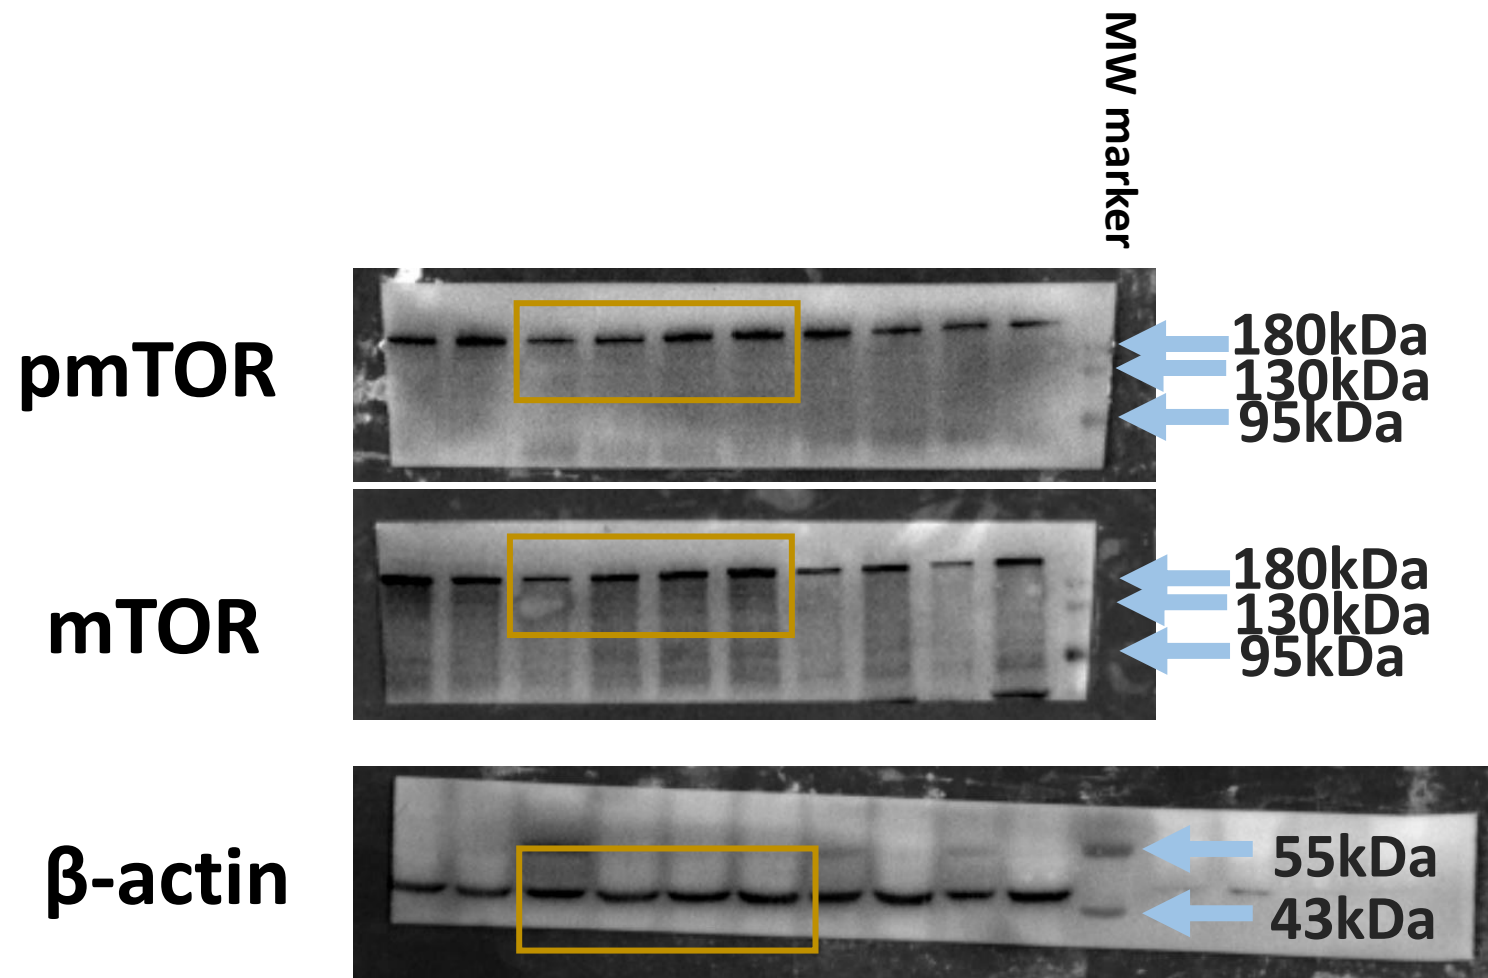

Full unedited gel/blot for Figure 6C in the manuscript
